# Supplementary material for: Association of Insulin, Metformin, and Statin with Mortality in Breast Cancer Patients
Source: PubMed Central journal article supplement — Cancer Res Treat. 2020 Sep 23;53(1):65–76. doi: 10.4143/crt.2020.430 (PMC7812023; doi:10.4143/crt.2020.430), 2020-09-23
Supplement: crt-2020-430_S2Table.pdf [file crt-2020-430_S2Table.pdf]

**S2 Table.** Characteristics of patients with and without insulin and/or metformin exposure before the diagnosis of ER-negative breast cancer.

|                              | <b>No exposure<br/>to either drug<br/>(n=161)</b> | <b>Exposure to<br/>insulin<br/>(n=10)</b> | <b>Exposure to<br/>metformin<br/>(n=71)</b> | <b>Exposure to<br/>both drugs<br/>(n=28)</b> | <b>Total<br/>(n=270)</b> | <b>p-value</b>      |
|------------------------------|---------------------------------------------------|-------------------------------------------|---------------------------------------------|----------------------------------------------|--------------------------|---------------------|
| <b>Histologic type</b>       |                                                   |                                           |                                             |                                              |                          |                     |
| IDC                          | 137 (85.09)                                       | 6 (60.00)                                 | 60 (84.51)                                  | 20 (71.43)                                   | 223 (82.59)              | 0.209 <sup>a)</sup> |
| ILC                          | 1 (0.62)                                          | 0                                         | 1 (1.41)                                    | 0                                            | 2 (0.74)                 |                     |
| Others                       | 23 (14.29)                                        | 4 (40.00)                                 | 10 (14.08)                                  | 8 (28.57)                                    | 45 (16.67)               |                     |
| <b>Stage: T</b>              |                                                   |                                           |                                             |                                              |                          |                     |
| T0                           | 0                                                 | 0                                         | 1 (1.41)                                    | 0                                            | 1 (0.37)                 | 0.148 <sup>a)</sup> |
| T1                           | 60 (37.27)                                        | 4 (40.00)                                 | 24 (33.80)                                  | 7 (25.00)                                    | 95 (35.19)               |                     |
| T2                           | 77 (47.83)                                        | 2 (20.00)                                 | 31 (43.66)                                  | 10 (35.71)                                   | 120 (44.44)              |                     |
| T3                           | 6 (3.73)                                          | 2 (20.00)                                 | 7 (9.86)                                    | 5 (17.86)                                    | 20 (7.41)                |                     |
| T4                           | 3 (1.86)                                          | 0                                         | 1 (1.41)                                    | 0                                            | 4 (1.48)                 |                     |
| Tis                          | 15 (9.32)                                         | 2 (20.00)                                 | 7 (9.86)                                    | 6 (21.43)                                    | 30 (11.11)               |                     |
| <b>Stage: N</b>              |                                                   |                                           |                                             |                                              |                          |                     |
| N0                           | 100 (62.11)                                       | 7 (70.00)                                 | 45 (63.38)                                  | 18 (64.29)                                   | 170 (62.96)              | 0.771 <sup>a)</sup> |
| N1                           | 39 (24.22)                                        | 1 (10.00)                                 | 16 (22.54)                                  | 5 (17.86)                                    | 61 (22.59)               |                     |
| N2                           | 12 (7.45)                                         | 1 (10.00)                                 | 3 (4.23)                                    | 4 (14.29)                                    | 20 (7.41)                |                     |
| N3                           | 10 (6.21)                                         | 1 (10.00)                                 | 7 (9.86)                                    | 1 (3.57)                                     | 19 (7.04)                |                     |
| <b>Stage: M</b>              |                                                   |                                           |                                             |                                              |                          |                     |
| M0                           | 160 (99.38)                                       | 10 (100.00)                               | 69 (97.18)                                  | 28 (100.00)                                  | 267 (98.89)              | 0.508 <sup>b)</sup> |
| M1                           | 1 (0.62)                                          | 0                                         | 2 (2.82)                                    | 0                                            | 3 (1.11)                 |                     |
| <b>PR</b>                    |                                                   |                                           |                                             |                                              |                          |                     |
| Negative                     | 158 (98.14)                                       | 10 (100.00)                               | 71 (100.00)                                 | 27 (96.43)                                   | 266 (98.52)              | 0.386 <sup>b)</sup> |
| Positive                     | 3 (1.86)                                          | 0                                         | 0                                           | 1 (3.57)                                     | 4 (1.48)                 |                     |
| <b>Age at diagnosis (yr)</b> |                                                   |                                           |                                             |                                              |                          |                     |
| < 40                         | 14 (8.70)                                         | 0                                         | 2 (2.82)                                    | 0                                            | 16 (5.93)                | 0.023 <sup>a)</sup> |
| ≥ 40 and < 50                | 29 (18.01)                                        | 0                                         | 7 (9.86)                                    | 1 (3.57)                                     | 37 (13.7)                |                     |
| ≥ 50                         | 118 (73.29)                                       | 10 (100.00)                               | 62 (87.32)                                  | 27 (96.43)                                   | 217 (80.37)              |                     |

| CCI              |           |            |           |            |           |                     |
|------------------|-----------|------------|-----------|------------|-----------|---------------------|
| Mean±SD          | 5.76±2.19 | 6±3.53     | 6.32±2.18 | 7.04±2.13  | 6.05±2.27 | 0.012 <sup>c)</sup> |
| Median (min-max) | 5 (1-16)  | 6.5 (1-12) | 6 (1-12)  | 7.5 (3-11) | 6 (1-16)  |                     |

Values are presented as number (%). CCI, Charlson comorbidity index; ER, estrogen receptor; IDC, invasive ductal carcinoma; ILC, invasive lobular carcinoma; M, metastasis; N, node; PR, progesterone receptor; SD, standard deviation; T, tumor. <sup>a)</sup>Chi-square test, <sup>b)</sup>Fisher exact test, <sup>c)</sup>Kruskal-Wallis test.
