# Supplementary material for: Association of Insulin, Metformin, and Statin with Mortality in Breast Cancer Patients
Source: PubMed Central journal article supplement — Cancer Res Treat. 2020 Sep 23;53(1):65–76. doi: 10.4143/crt.2020.430 (PMC7812023; doi:10.4143/crt.2020.430), 2020-09-23
Supplement: crt-2020-430_S4Table.pdf [file crt-2020-430_S4Table.pdf]

**S4 Table.** Characteristics of patients with and without statin exposure before the diagnosis of ER-positive breast cancer

|                       | <b>No statin<br/>(n=4,662)</b> | <b>Patients with<br/>statin exposure<br/>(n=659)</b> | <b>Total<br/>(n=5,321)</b> | <b>p-value</b>        |
|-----------------------|--------------------------------|------------------------------------------------------|----------------------------|-----------------------|
| Histologic type       |                                |                                                      |                            |                       |
| IDC                   | 3,599 (77.20)                  | 509 (77.24)                                          | 4,108 (77.20)              | 0.475 <sup>a)</sup>   |
| ILC                   | 236 (5.06)                     | 40 (6.07)                                            | 276 (5.19)                 |                       |
| Others                | 827 (17.74)                    | 110 (16.69)                                          | 937 (17.61)                |                       |
| Stage: T              |                                |                                                      |                            |                       |
| T0                    | 17 (0.36)                      | 3 (0.46)                                             | 20 (0.38)                  | 0.146 <sup>a)</sup>   |
| T1                    | 2,344 (50.28)                  | 354 (54.17)                                          | 2,701 (50.76)              |                       |
| T2                    | 1,611 (34.56)                  | 226 (34.29)                                          | 1,837 (34.52)              |                       |
| T3                    | 217 (4.65)                     | 19 (2.88)                                            | 236 (4.44)                 |                       |
| T4                    | 65 (1.39)                      | 7 (1.06)                                             | 72 (1.35)                  |                       |
| Tis                   | 408 (8.75)                     | 47 (7.13)                                            | 455 (8.55)                 |                       |
| Stage: N              |                                |                                                      |                            |                       |
| N0                    | 3,154 (67.65)                  | 454 (68.89)                                          | 3,608 (67.81)              | 0.023 <sup>a)</sup>   |
| N1                    | 1,018 (21.84)                  | 136 (20.64)                                          | 1,154 (21.69)              |                       |
| N2                    | 350 (7.51)                     | 37 (5.61)                                            | 387 (7.27)                 |                       |
| N3                    | 140 (3.00)                     | 32 (4.86)                                            | 172 (3.23)                 |                       |
| Stage: M              |                                |                                                      |                            |                       |
| M0                    | 4,628 (99.27)                  | 655 (99.39)                                          | 5,283 (99.29)              | > 0.999 <sup>b)</sup> |
| M1                    | 34 (0.73)                      | 4 (0.61)                                             | 38 (0.71)                  |                       |
| PR                    |                                |                                                      |                            |                       |
| Negative              | 992 (21.28)                    | 171 (25.95)                                          | 1,163 (21.86)              | 0.007 <sup>a)</sup>   |
| Positive              | 3,670 (78.72)                  | 488 (74.05)                                          | 4,158 (78.14)              |                       |
| HER2                  |                                |                                                      |                            |                       |
| Negative              | 2,242 (80.39)                  | 331 (83.17)                                          | 2,573 (80.73)              | 0.189 <sup>a)</sup>   |
| Positive              | 547 (19.61)                    | 67 (16.83)                                           | 614 (19.27)                |                       |
| Age at diagnosis (yr) |                                |                                                      |                            |                       |

|                  |               |             |               |                       |
|------------------|---------------|-------------|---------------|-----------------------|
| < 40             | 703 (15.08)   | 3 (0.46)    | 706 (13.27)   | < 0.001 <sup>a)</sup> |
| ≥ 40 and < 50    | 2,035 (43.65) | 60 (9.10)   | 2,095 (39.37) |                       |
| ≥ 50             | 1,924 (41.27) | 596 (90.44) | 2,520 (47.36) |                       |
| CCI              |               |             |               |                       |
| Mean±SD          | 3.82±1.77     | 5.11±2.31   | 3.98±1.89     | < 0.001 <sup>c)</sup> |
| Median (min-max) | 3 (0-12)      | 5 (0-14)    | 4 (0-14)      |                       |

Values are presented as number (%). CCI, Charlson comorbidity index; ER, estrogen receptor; HER2, human epidermal growth factor receptor 2; IDC, invasive ductal carcinoma; ILC, invasive lobular carcinoma; M, metastasis; N, node; PR, progesterone receptor; SD, standard deviation; T, tumor. <sup>a)</sup>Chi-square test, <sup>b)</sup>Fisher exact test, <sup>c)</sup>Wilcoxon rank sum test.
