# Supplementary material for: Association of Insulin, Metformin, and Statin with Mortality in Breast Cancer Patients
Source: PubMed Central journal article supplement — Cancer Res Treat. 2020 Sep 23;53(1):65–76. doi: 10.4143/crt.2020.430 (PMC7812023; doi:10.4143/crt.2020.430), 2020-09-23
Supplement: crt-2020-430_S8Table.pdf [file crt-2020-430_S8Table.pdf]

**S8 Table.** Cox proportional hazards model of survival for patients with and without insulin and/or metformin exposure before the diagnosis of ER-positive breast cancer

| <b>Variable</b>       | <b>Univariable analysis<br/>Hazard ratio (95%<br/>CI)</b> | <b>p-value</b> | <b>Multivariable<br/>analysis<br/>Hazard ratio (95%<br/>CI)</b> | <b>p-value</b> |
|-----------------------|-----------------------------------------------------------|----------------|-----------------------------------------------------------------|----------------|
| Histologic type       |                                                           |                |                                                                 |                |
| IDC                   | 1                                                         |                | 1                                                               |                |
| ILC                   | 2.264 (0.894-5.729)                                       | 0.085          | 1.298 (0.431-3.267)                                             | 0.617          |
| Others                | 0.111 (0.015-0.809)                                       | 0.030          | 0.279 (0.031-1.082)                                             | 0.068          |
| Stage: T              |                                                           |                |                                                                 |                |
| T1                    | 1                                                         |                | 1                                                               |                |
| T0                    | 1.657 (0.013-12.743)                                      | 0.746          | 1.141 (0.008-12.813)                                            | 0.934          |
| T2                    | 3.513 (1.834-7.220)                                       | < 0.001        | 3.287 (1.636-7.020)                                             | 0.001          |
| T3                    | 9.811 (3.898-23.729)                                      | < 0.001        | 7.440 (2.410-23.115)                                            | 0.001          |
| T4                    | 2.474 (0.019-19.073)                                      | 0.583          | 0.793 (0.005-10.176)                                            | 0.883          |
| Tis                   | 0.294 (0.002-2.259)                                       | 0.303          | 1.297 (0.009-26.020)                                            | 0.879          |
| Stage: N              |                                                           |                |                                                                 |                |
| N0                    | 1                                                         |                | 1                                                               |                |
| N1                    | 2.086 (1.080-4.030)                                       | 0.029          | 1.138 (0.560-2.287)                                             | 0.718          |
| N2                    | 1.830 (0.543-6.161)                                       | 0.330          | 1.120 (0.275-3.396)                                             | 0.858          |
| N3                    | 11.555 (5.405-24.704)                                     | < 0.001        | 3.697 (1.380-9.098)                                             | 0.011          |
| Stage: M              |                                                           |                |                                                                 |                |
| M0                    | 1                                                         |                | 1                                                               |                |
| M1                    | 20.536 (6.263-67.330)                                     | < 0.001        | 3.258 (0.743-11.337)                                            | 0.109          |
| PR                    |                                                           |                |                                                                 |                |
| Negative              | 1                                                         |                | 1                                                               |                |
| Positive              | 0.472 (0.265-0.838)                                       | 0.010          | 0.522 (0.295-0.946)                                             | 0.033          |
| Age at diagnosis (yr) |                                                           |                |                                                                 |                |

|                                       |                      |       |                      |       |
|---------------------------------------|----------------------|-------|----------------------|-------|
| < 40                                  | 1                    |       | 1                    |       |
| ≥ 40 and < 50                         | 1.236 (0.149-10.281) | 0.845 | 1.001 (0.200-9.887)  | 0.999 |
| ≥ 50                                  | 2.369 (0.325-17.249) | 0.394 | 1.567 (0.380-14.501) | 0.584 |
| CCI                                   | 1.128 (1.004-1.266)  | 0.043 | 1.055 (0.923-1.202)  | 0.429 |
| Exposure before breast cancer         |                      |       |                      |       |
| Reference: no exposure to either drug | 1                    |       | 1                    |       |
| Exposure to insulin                   | 2.130 (0.503-9.016)  | 0.305 | 3.260 (0.595-11.394) | 0.150 |
| Exposure to metformin                 | 1.265 (0.671-2.384)  | 0.468 | 1.169 (0.589-2.270)  | 0.650 |
| Exposure to insulin and metformin     | 1.691 (0.728-3.927)  | 0.222 | 1.505 (0.598-3.384)  | 0.365 |

CCI, Charlson comorbidity index; CI, confidence interval; DM, diabetes mellitus; ER, estrogen receptor; IDC, invasive ductal carcinoma; ILC, invasive lobular carcinoma; M, metastasis; N, node; PR, progesterone receptor; T, tumor.
